# Supplementary material for: Intrinsically disordered RGG/RG domains mediate degenerate specificity in RNA binding
Source: PubMed Central journal article supplement — Nucleic Acids Res. 2017 May 27;45(13):7984–96. doi: 10.1093/nar/gkx460 (PMC5570134; doi:10.1093/nar/gkx460), 2017-05-27
Supplement: gkx460_supp.pdf [file gkx460_supp.pdf]

**Intrinsically disordered RGG/RG domains mediate degenerate specificity in RNA binding**

Bagdeser A. Ozdilek<sup>a</sup>, Valery F. Thompson<sup>b</sup>, Nasiha S. Ahmed<sup>b,c</sup>, Connor I. White<sup>b</sup>, Robert T. Batey<sup>d\*</sup> and Jacob C. Schwartz<sup>b\*</sup>

<sup>a</sup> Department of Molecular, Cellular and Developmental Biology, University of Colorado at Boulder, Campus Box 347, Boulder Colorado 80309.

<sup>b</sup> Department of Chemistry and Biochemistry, University of Arizona Tucson, Tucson Arizona

<sup>c</sup> Department of Molecular and Cellular Biology, University of Arizona Tucson, Tucson, Arizona

<sup>d</sup> Department of Chemistry and Biochemistry, University of Colorado at Boulder, Campus Box 596, Boulder Colorado 80309-0596.

\*Corresponding Co-author:

Tel: (303)-735-2159

Fax: (303)-492-8425

Email: robert.batey@colorado.edu

Tel: 940-367-8186

Email: jcschwartz@email.arizona.edu

**Supplementary Table S1:** Sequences of RNA substrates used in this study.

| <b>Name</b>   | <b>Length<br/>(Nucleotides)</b> | <b>Sequence</b>                                                                                                                                                                      | <b>Structure</b>                |
|---------------|---------------------------------|--------------------------------------------------------------------------------------------------------------------------------------------------------------------------------------|---------------------------------|
| <b>DNMT</b>   | 48                              | AUUGAGGAGCAGCAGAGAAGUUGGA<br>GUGAAGGCAGAGAGGGGUUAAGG                                                                                                                                 | N.A                             |
| <b>Sc1</b>    | 36                              | GCUGCGGUGUGGAAGGAGUGGCUG<br>GGUUGCGCAGG                                                                                                                                              | Stem loop <sup>1</sup>          |
| <b>dsGC</b>   | 36                              | AUAUACGCGCGUAUAUUUCGAUAUAC<br>GCGCGUAUUAU                                                                                                                                            | Hairpin                         |
| <b>dsAU</b>   | 36                              | AUAUAUAUAUAUAUAUUUCGAUAUAU<br>AUAUAUAUAU                                                                                                                                             | Hairpin                         |
| <b>hRRD</b>   | 152                             | CAUGGAUCCCUGAGGUCGGUCCCCAAUA<br>CGACAAGACAAUUUGAUUCAUAAUAGAA<br>CACUGCAGAAACAAUGCUGAGUGAAGAA<br>GAGUAGAAAUGGGAAGACUUGGUUGAGC<br>GGAAACUGAGUUCUUGAAAAGAGGAGAU<br>GCUUGAUGAGG          | N.A <sup>a</sup>                |
| <b>mRRD</b>   | 155                             | AACUGGCCCCUGGGAUUUUGCUGCUC<br>AGAACCUGAGUUCACUGAGACAUCAG<br>GAGCAAGCACUGGAGGCCGGGUGCU<br>GCUGGACCCAGAUGGGAGCCAUGCA<br>GGACUUGACCAUGGCCUGCACACAC<br>UUCUUCCCAGGAGAAGGGGAAUGAG<br>GAAG | N.A                             |
| <b>GGUG</b>   | 25                              | UUGUAUUUUGAGCUAGUUUGGUGAU                                                                                                                                                            | N.A                             |
| <b>CRL</b>    | 36                              | AUACAACAUACAACAUACAACAUACAA<br>CAUACAACA                                                                                                                                             | Single<br>stranded <sup>2</sup> |
| <b>Poly-A</b> | 40                              | AAAAAAAAAAAAAAAAAAAAAAAAAAAAA<br>AAAAAAAAAAAAA                                                                                                                                       | Single<br>stranded <sup>3</sup> |

N.A.<sup>a</sup>: Not available.

**Supplementary Table S2:**  $K_{D,app}$  ( $\mu\text{M}$ ) values of ZnF, RRM and RRM+3 RGG interaction with different RNA molecules.

| Protein      | RNA              |         |        |        |        |        |        |
|--------------|------------------|---------|--------|--------|--------|--------|--------|
|              | Sc1              | DNMT    | hRRD   | mRRD   | GGUG   | CRL    | Poly-A |
| ZnF          | n.d <sup>a</sup> | n.d     | n.d    | n.d    | n.d    | n.d    | n.d    |
| RRM          | 48 ± 3           | n.d     | n.d    | n.d    | n.d    | n.d    | 45 ± 2 |
| RRM+3<br>RGG | 27 ± 2           | 4 ± 0.5 | 16 ± 3 | 10 ± 1 | 21 ± 1 | 63 ± 8 | 40 ± 5 |

<sup>a</sup>n.d. : not detectable (>100  $\mu\text{M}$ )

**Supplementary Table S3: Mutated arginine residues in SGG mutants.**

|             |                                                                                                                                                                                      |
|-------------|--------------------------------------------------------------------------------------------------------------------------------------------------------------------------------------|
| <b>SGG1</b> | R213S, R216S, R218S, R234S, R242S, R244S, R248S, R251S, R259S                                                                                                                        |
| <b>SGG2</b> | R377S, R383S, R386S, R388S, R394S, R407S, R422S                                                                                                                                      |
| <b>SGG3</b> | R472S, R473S, R476S, R481S, R485S, R487S, R491S, R495S, R498S, R503S                                                                                                                 |
| <b>SGG4</b> | R213S, R216S, R218S, R234S, R242S, R244S, R248S, R251S, R259S, R377S, R383S, R386S, R388S, R394S, R407S, R422S, R472S, R473S, R476S, R481S, R485S, R487S, R491S, R495S, R498S, R503S |

**Supplementary Table S4:** Corresponding  $K_{D,app}$  ( $\mu\text{M}$ ) values of heat-map data in Figure 5.

|                | RNA             |               |                 |                 |                   |               |               |               |               |
|----------------|-----------------|---------------|-----------------|-----------------|-------------------|---------------|---------------|---------------|---------------|
|                | Sc1             | DMNT          | hRRD            | mRRD            | dsGC              | dsAU          | GGUG          | CRL           | poly-A        |
| <b>Protein</b> |                 |               |                 |                 |                   |               |               |               |               |
| FMRP-RGG       | $0.09 \pm 0.02$ | $2.5 \pm 0.4$ | $0.30 \pm 0.01$ | $0.35 \pm 0.03$ | $8.0 \pm 0.1$     | $8.3 \pm 0.5$ | $27 \pm 3$    | $27 \pm 1$    | $50 \pm 1$    |
| hnRNP-U-RGG    | $0.25 \pm 0.01$ | $0.5 \pm 0.1$ | $0.30 \pm 0.02$ | $0.5 \pm 0.1$   | $15 \pm 1$        | $43 \pm 20$   | $8.5 \pm 1.0$ | $8.0 \pm 0.5$ | $9.0 \pm 0.5$ |
| FUS-RGG1       | $2.8 \pm 0.1$   | $3.0 \pm 0.1$ | $1.6 \pm 0.1$   | $1.3 \pm 0.1$   | $22 \pm 1$        | $29 \pm 1$    | $16 \pm 1$    | $17 \pm 1$    | $25 \pm 5$    |
| FUS-RGG2       | $25 \pm 1$      | $60 \pm 15$   | $14 \pm 1$      | $26 \pm 4$      | n.d. <sup>a</sup> | n.d.          | n.d.          | n.d.          | n.d.          |
| FUS-RGG3       | $3.7 \pm 0.2$   | $8.0 \pm 0.5$ | $4.5 \pm 1.0$   | $4.5 \pm 0.5$   | $100 \pm 30$      | n.d.          | $50 \pm 3$    | $65 \pm 6$    | $110 \pm 30$  |
| FUS-LC-RGG1    | $2.8 \pm 0.5$   | $6.2 \pm 0.3$ | $3.0 \pm 0.3$   | $1.0 \pm 0.3$   | $45 \pm 2$        | $72 \pm 5$    | $12 \pm 1$    | $19 \pm 1$    | $5 \pm 2$     |
| FUS-RRM-RGG2   | $2.8 \pm 0.2$   | $2.5 \pm 0.1$ | $1.2 \pm 0.2$   | $1.8 \pm 0.1$   | $15 \pm 1$        | $17 \pm 2$    | $11 \pm 1$    | $9.5 \pm 0.5$ | $17 \pm 3$    |
| FUS (wt)       | $0.30 \pm 0.02$ | $0.7 \pm 0.2$ | $0.60 \pm 0.05$ | $0.33 \pm 0.07$ | $7.3 \pm 0.2$     | $8.4 \pm 0.5$ | $3.0 \pm 0.1$ | $10 \pm 1$    | $3.2 \pm 0.2$ |

<sup>a</sup>n.d. : not detectable ( $>100 \mu\text{M}$ ).

**Supplementary Table S5:** Effects of mutations in Sc1 RNA on RNA binding activity of RGG domains.

| <b>Protein</b> | <b><math>K_{D,relative}</math> (<math>K_{D,app, mutant} / K_{D,app, Sc1}</math>)</b> |                        |
|----------------|--------------------------------------------------------------------------------------|------------------------|
|                | <b>Mutant C5U-G31A</b>                                                               | <b>Mutant G7A-C30U</b> |
| FMRP-RGG       | 28                                                                                   | 24                     |
| hnRNPU-RGG     | 11                                                                                   | 10                     |
| FUS-RGG1       | 4                                                                                    | 2                      |
| FUS-RGG2       | 1.5                                                                                  | 1.5                    |
| FUS-RGG3       | 4.5                                                                                  | 3.8                    |
| FUS (WT)       | 5.5                                                                                  | 5                      |

## Figure Legends

**Supplementary Figure S1. SDS-PAGE analysis of protein expression and purification.** Representative SDS-PAGE image of FUS protein purification. FUS was expressed and purified as described in methods. M: protein marker (Invitrogen), lane 1: non-induced (BL21 (DE3) Rosetta Plys) cells, lane 2: IPTG-Induced cells, lane 3: supernatant, lane 4: flow through, lane 5, 6 and 7 are washes of the Ni-NTA with lysis buffer, lane 8: wash of the Ni-NTA with 100 mM imidazole in lysis buffer, lane 9: Elution of FUS protein with 250 mM imidazole in lysis buffer, lane 10: purified FUS protein by size exclusion chromatography.

**Supplementary Figure S2. RGG/RG domains and sequence are conserved across diverse metazoan species.** The amino acid sequences of RGG domains of FUS, FMRP and hnRNPU from human, mouse, xenopus and zebrafish were aligned. Pink and yellow colors show conserved RGG and RG repeats, respectively. “\*” symbol shows the arginine amino acids of FMRP-RGG that directly make hydrogen bonds with guanines in Sc1 RNA.

**Supplementary Figure S3. RRM and ZnF domains of FUS correctly folded, but do not bind to RNA.** (a) CD spectra of RRM and ZnF domains (no MBP tag) of FUS. The values are 5% alpha-helix, 23%  $\beta$ -strand for ZnF and 28% alpha-helix, 25%  $\beta$ -strand for RRM. Representative binding isotherms and non-linear curve fitting for the titrations of 800  $\mu$ M DNMT RNA in 200  $\mu$ M (b) ZnF or (c) RRM and for the titrations of 400  $\mu$ M DNMT RNA in 100  $\mu$ M RGG1-RRM-RGG2 and RRM-RGG2. (Top panels) Raw heats of binding obtained by Isothermal titration calorimetry (ITC) when proteins mixed with DNMT RNA. (Bottom panels) Binding isotherms fitted to the raw data using single-state

binding model. Titrations were performed in 150 mM KCl, 50 mM tris buffer. RGG1-RRM-RGG2 binds to DNMT RNA with  $3 \pm 0.4 \mu\text{M}$  affinity and RRM-RGG2 shows a  $5 \pm 0.2 \mu\text{M}$  binding affinity.

**Supplementary Figure S4. Flanking RGG domains impart the RNA binding activity of the ZnF domain.** (a) Representative EMSAs and the corresponding binding curves showing binding of DNMT RNA to RGG2-ZnF (372-453), ZnF-RGG3 (423-501) and RGG2-ZnF-RGG3 (372-501). *b* = bound DNMT RNA and *f* = free DNMT RNA. ‘(-)’ shows no protein lane. Error bars represent the S.D. of three independent titrations for each construct.

**Supplementary Figure S5. Interaction between RGG1-RRM-RGG2 and DNMT RNA shows a salt dependence.** ITC titrations were performed for the interaction of RGG1-RRM-RGG2 and DNMT RNA in different KCl concentrations (50 mM, 100 mM, 150 mM, 200 mM, 250 mM, 300 mM). The graph shows linear correlation between  $\log(K_a)$  and  $\log(\text{KCl concentration in M})$  for three independent repeats. Values of each repeat are shown with black circles. Red line indicates mean of the three repeats.

**Supplementary Figure S6. G-quartets formation in Sc1, DNMT and GGUG RNAs.** (Top) Representative gels with RNaseT1 digestion of (a) Sc1, (b) DNMT and (c) GGUG RNAs in KCl and LiCl buffers. (Bottom) Bands were quantified by Image Quant and the amount of protection for each band (fold change in band intensity, KCl/LiCl) was calculated. The Guanines involved in G-quadruplex formation in Sc1 RNA were shown with ‘\*’ symbol. Lane 1 is RNA alone (No RNase T1), lane 2 shows alkaline hydrolysis of corresponding RNA, lane 3 and lane 4 is RNase T1 reaction in LiCl and KCl, respectively.



**Supplementary Figure S7. Effects of G-quartet formation on RNA binding activity of different RGG domains.** Binding of RGG domains to Sc1 RNA was measured in the presence of KCl and LiCl by EMSA. Representative binding curves of FUS and FMRP-RGG binding to Sc1 RNA was shown and fold change in the dissociation constant of RGG domains for LiCl and KCl buffers were presented. Error bars represent the S.D. of at least two independent titrations for each construct.

Supplementary Figure S1

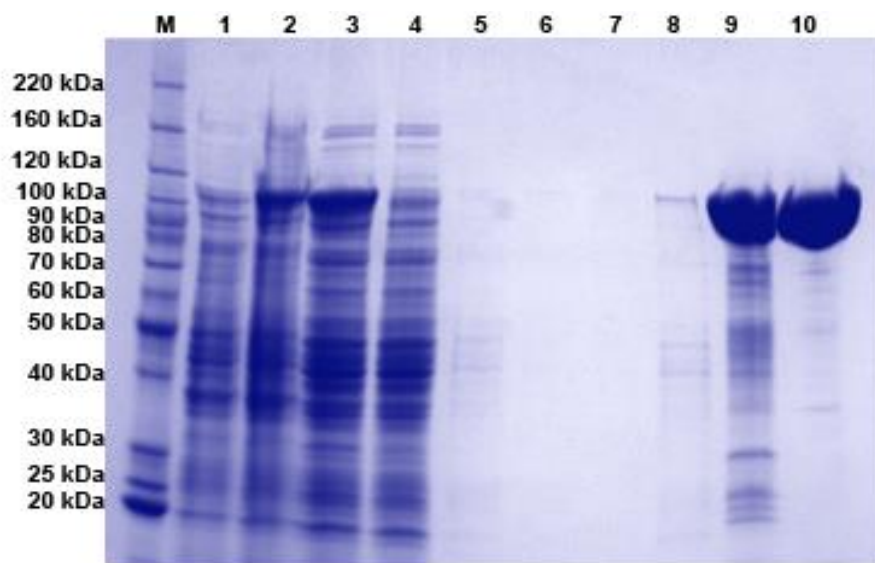

## Supplementary Figure S2

### FMRP-RGG

```

      *      *
H. sapiens   RRGDGRFRGGGGRGQGGRRGGGFKG :552
M. musculus RRGDGRFRRRGGGGRGQGGRRGGGFKG :576
X. laevis   RRGDGRFR.GGTRGQGMRRGG.FKG :484
D. rerio    RRGDGRKRGGGPRGRGGRRGR..YK :487
  
```

### FUS-RGG1

```

H. sapiens   EPGRGGGRGGSSGGGGGGGGYNNRSSGGYEPGRGGGRGGRGGMGGSDRGGFN :263
M. musculus GGQQDRGGRRGGGGG.....YNNRSSGGYEPGRGGGRGGRGGMGGSDRGGFN :256
X. laevis   GGQDSRGGRRGGGFGG.....RGGGGFDSRGRG.TRGGRRGGMGGGERGGFS :273
D. rerio    YSQDGRGGRRGGGFG.....GRGAGGFDRGGRRGGPRG.RGGMGMGDRGGFN :275
  
```

### FUS-RGG2

```

H. sapiens   .DFN.RGGGNGRGGGRGGPMGRGGYGGGGSSGGGRGGF :410
M. musculus ..FN.RGGGNGRGGGRGGPMGRGGYGGGGSSGGGRGGF :403
X. laevis   ADFNSRGGGNGR.GRGRGGPMGRGGFGGPPGGSSSRGGS :423
D. rerio    FGRG.GSSGGMRRGGRRGGPMGRGGFGGG.....RGGG :420
  
```

### FUS-RGG3

```

H. sapiens   DRGGGRGGYDRGGYRGRGGDRGGFRGGRRGGD :500
M. musculus DRRG.RGGYDRGGYRGRGGDRGGFRGGRRGGD :494
X. laevis   ERGGRRGGFDRGGFRGRGGDRGGFRGGRRGG.D :513
D. rerio    GERGRSGFDRGGFRGRGGDRGGFRGGRRGG.D :519
  
```

### hNRNPU-RGG

```

H. sapiens   FNRGGGHRGRGGFNMRGGNF.RGGAPGNRGGYNRRGNMPQRGGGGSSGGI :730
M. musculus FNRGGGHRGRGGFNMRGGNF.RGGAPGNRGGYNRRGNMPQRGGGGG.SGGI :751
X. laevis   RGRGGG.....YNMRGGNF.RGGAPGNRGGYNRRGNMPQRGGGGSGAVGY :696
D. rerio    SPRGGQMRGNMAS..RGGGMSRGGHAN.RGG.....NMH.RGGGQGGPNHR :741
  
```

Supplementary Figure S3

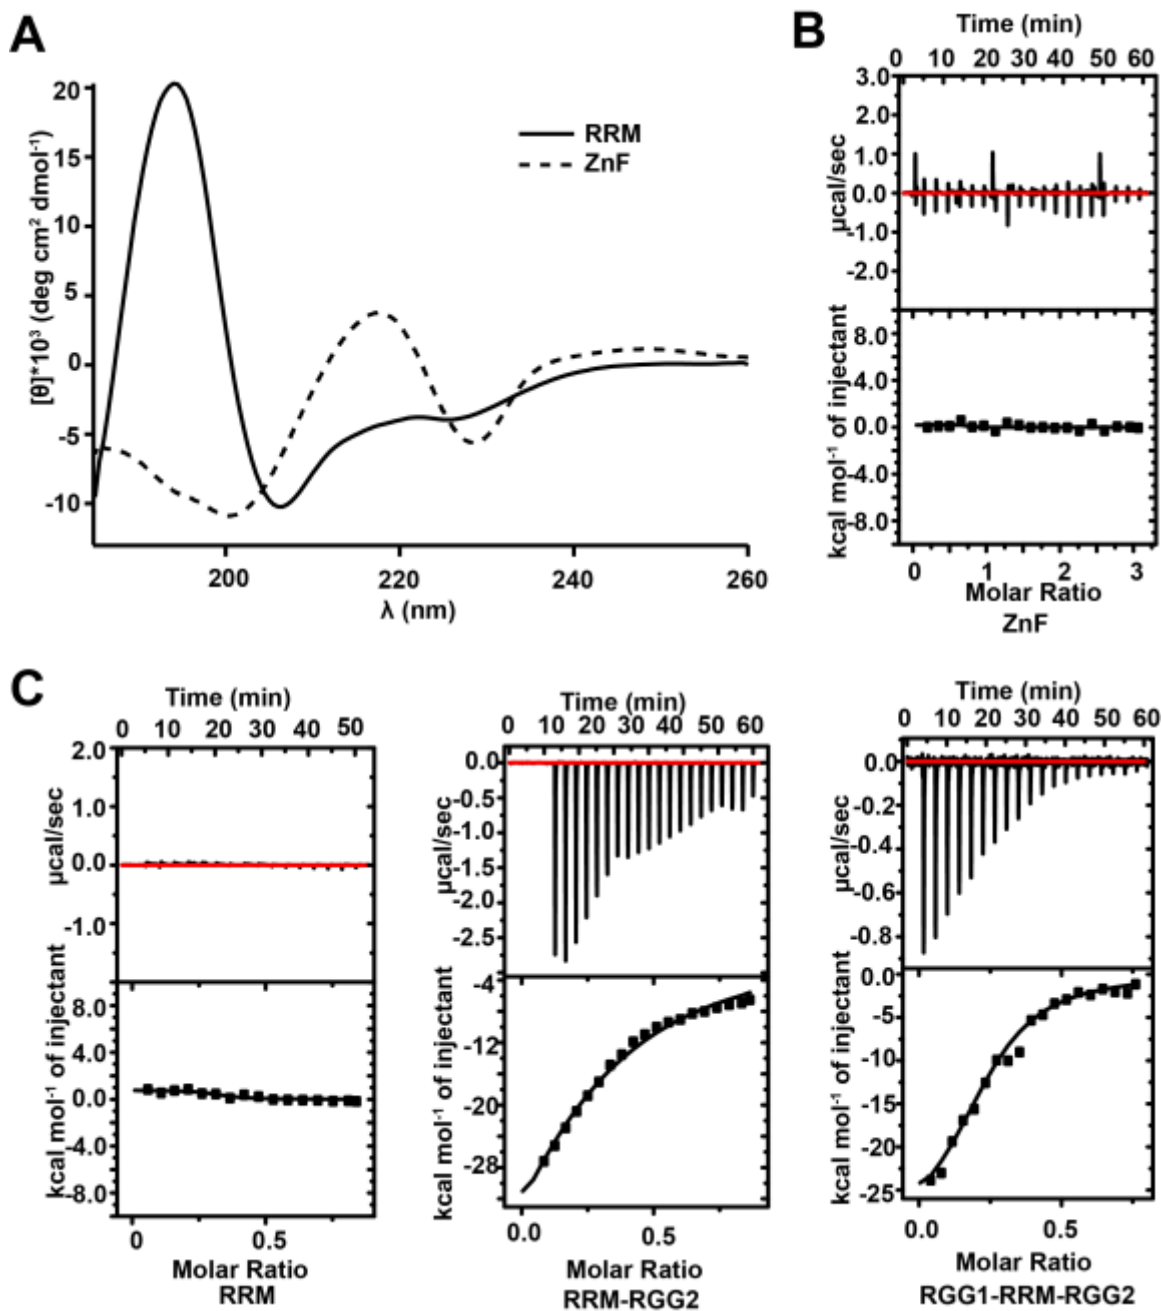

Supplementary Figure S4

**A**

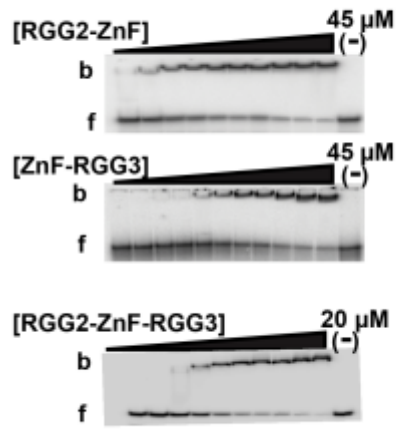

**B**

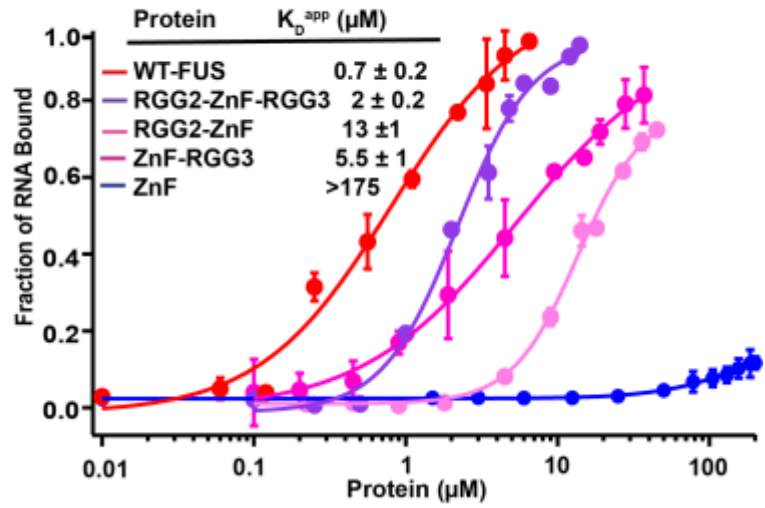

Supplementary Figure S5

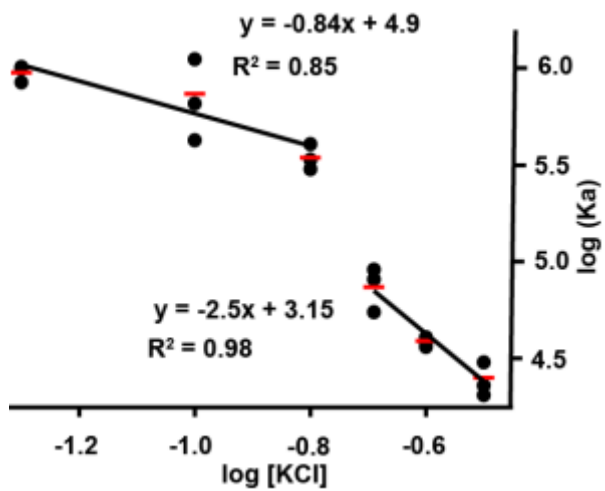

Supplementary Figure S6

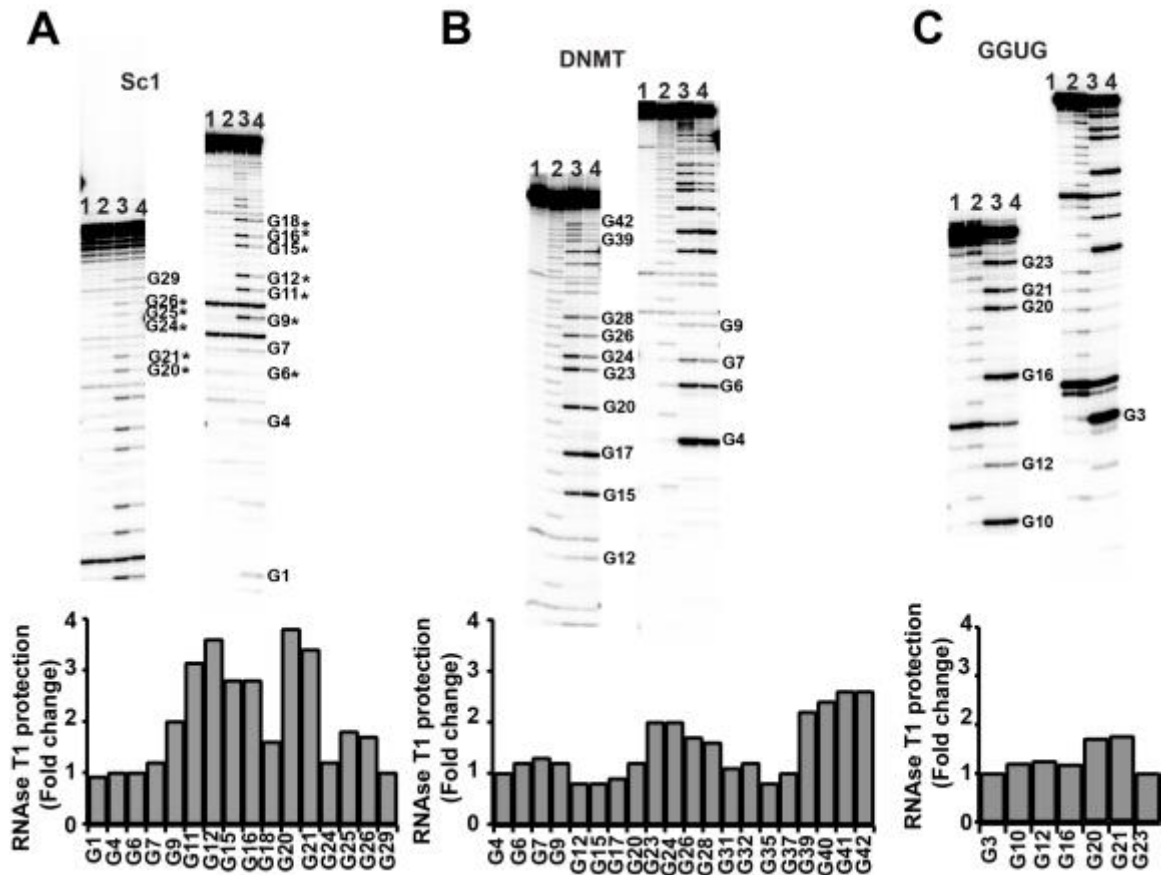

Supplementary Figure S7

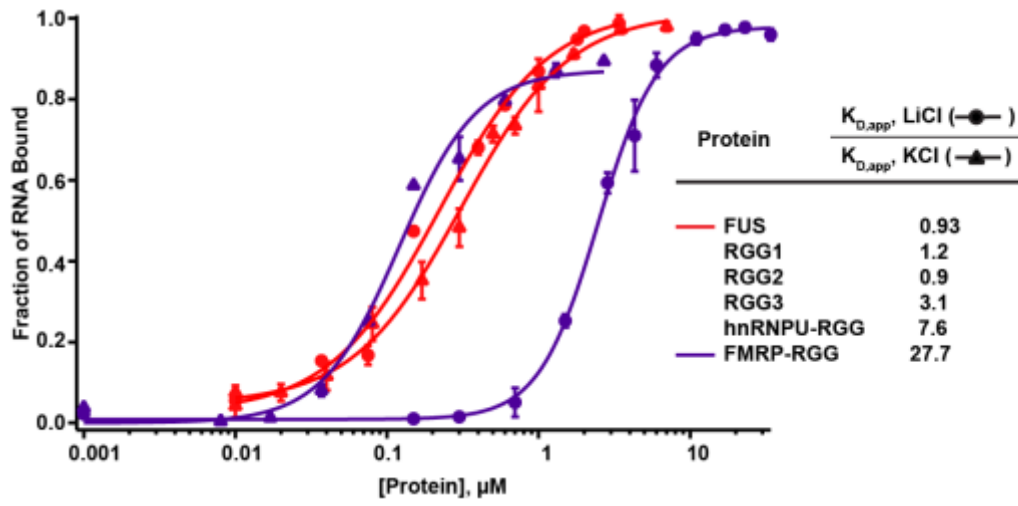



## REFERENCES

1. Vasilyev, N. et al. Crystal structure reveals specific recognition of a G-quadruplex RNA by a beta-turn in the RGG motif of FMRP. *Proc Natl Acad Sci USA* **112**, E5391-400 (2015).
2. Polaski, J.T., Holmstrom, E.D., Nesbitt, D.J. & Batey, R.T. Mechanistic Insights into Cofactor-Dependent Coupling of RNA Folding and mRNA Transcription/Translation by a Cobalamin Riboswitch. *Cell Rep* **15**, 1100-10 (2016).
3. Seol, Y., Skinner, G.M., Visscher, K., Buhot, A. & Halperin, A. Stretching of homopolymeric RNA reveals single-stranded helices and base-stacking. *Phys Rev Lett* **98**, 158103 (2007).
